# Supplementary material
Source: publisher figshare collection journal article supplement (https://acs.figshare.com/ndownloader/files/4373536)

## Supporting Information

# Preparation of 4-Allylisoindoline via a Kumada Coupling with Allylmagnesium Chloride

*Michael J. Zacuto,\* C. Scott Shultz, and Michel Journet*

Department of Process Research, Merck and Co., Inc. P.O. Box 2000 Rahway, NJ 07065

[michael\\_zacuto@merck.com](mailto:michael_zacuto@merck.com)

## Table of Contents

|                                                                         |      |
|-------------------------------------------------------------------------|------|
| General Methods.....                                                    | S1   |
| Experimental Procedure and Characterization Data for <b>1•HCl</b> ..... | S2-3 |
| Experimental Procedure and Characterization Data for <b>3•HCl</b> ..... | S4   |
| NMR Spectra .....                                                       | S5-8 |

## General Methods

Reagents and solvents were obtained from commercial sources and were used as received. Chromatography was performed using silica gel (70-230 mesh), using reagent grade solvents which were used as received. <sup>1</sup>H NMR spectra were recorded at 400 MHz using Bruker Avance 400 NMR spectrometers unless otherwise noted, using the *d*<sub>6</sub>-dmsO resonance as an internal standard measured at 2.50 ppm. <sup>13</sup>C NMR spectra were recorded on 100 or 125 MHz using Bruker Avance NMR spectrometers unless otherwise noted, using the *d*<sub>6</sub>-dmsO resonance as an internal standard measured at 39.5 ppm. All manipulations were carried out under an inert atmosphere of nitrogen using standard Schlenk techniques unless otherwise noted. Allyl-MgCl was purchased from Acros and was used as received. Pd(OAc)<sub>2</sub> and (neopentyl)(*t*-Bu<sub>2</sub>)P•HBF<sub>4</sub> were purchased from Strem Chemicals and used as received. All other reagents were purchased from Aldrich Chemical Co. unless otherwise noted.

**4-Allylisoindoline•HCl.** A 3 L flask equipped with overhead stirring, an addition funnel and a thermocouple was purged with N<sub>2</sub>, then charged under positive N<sub>2</sub> pressure with **2•HCl** (100 g, 0.426 mol), Pd(OAc)<sub>2</sub> (0.48 g, 2.13 mmol) and (neopentyl)*t*Bu<sub>2</sub>P•HBF<sub>4</sub> (1.3 g, 4.3 mmol). The flask was then charged with toluene (1.8 L, which had been previously de-oxygenated *via* N<sub>2</sub> subsurface sparging). Allylmagnesium chloride (800 mL, 1.36 mol, 1.7 M in THF) was charged to the addition funnel and then added to the slurry, with external cooling, over 1 h such that T<sub>i</sub> ≤ 25 °C.<sup>1</sup> The resulting solution was then heated to and maintained at T<sub>i</sub> = 45-50 °C for 16 h. After cooling to ambient temperature, the reaction was inverse-quenched by slow transfer, with external cooling and at a rate such that T<sub>i</sub> < 35 °C, into a 3 L jacketed flask (equipped with a drop valve and overhead stirring) that had been charged with a solution of 15 wt% citric acid (1.1 L). The organic phase, which contained 1.2 g of **1** by assay, was rejected. The aqueous phase was assayed for 61.3 g of **1** (90% yield in organic phase, corresponding to a 92% end of reaction assay yield, along with 2.6% AY of **3**). The aqueous phase was transferred to an extractor, to which was charged fresh toluene (650 mL) and the resulting biphasic mixture was stirred. Ammonium hydroxide (28-30% in water, 650 mL) was added at a rate such that T<sub>i</sub> ≤ 30 °C, resulting in a pH 10 aqueous phase. The phases were separated, and the aqueous phase (which contained 1.8 g of **1** by assay, 1.0 g/L) was extracted with 200 mL of toluene (0.3 g of **1** remained in the aqueous phase after extraction, or 0.18 g/L). The combined organic phases were then washed with 160 mL of 15 wt% aqueous NaCl. The toluene solution was dried via azeotropic distillation with toluene under "constant volume" conditions, then concentrated to a 650

<sup>1</sup> Evolution of propene occurs during the exothermic addition of allylmagnesium chloride at a rate proportional to the rate of addition. A mild N<sub>2</sub> sweep efficiently removed any residual propene that was observed to evolve upon heating to T<sub>i</sub> = 45 °C.

mL total volume solution (KF = 500 ppm H<sub>2</sub>O). The solution was assayed by wt/wt% to contain 59.4 g of **1** (87.5% AY after workup).

The toluene solution of **1** was transferred to a 1 L flask equipped with overhead stirring, an addition funnel and a thermocouple. A solution of HCl in *i*PrOH (5.1 M) was transferred to the addition funnel, and then added slowly over 1 hour to the solution of **1** in toluene, at a rate such that  $T_i \leq 40\text{ }^{\circ}\text{C}$ . The resulting slurry was aged for 6 hours, with gradual cooling to ambient temperature. The slurry was then slowly cooled to  $T_i = 0\text{ }^{\circ}\text{C}$  over 1 hour, then maintained at this temperature for an additional hour. The slurry was filtered, with loss to the supernatant assayed at 7.6 g/L of **1**•HCl (4.12 g total, along with 1.6 g of **3**•HCl). The cake was washed with 175 mL of 9:1 toluene:IPA (pre-cooled to  $T_i = 0\text{ }^{\circ}\text{C}$ ), then dried with vacuum/N<sub>2</sub> sweep. **1**•HCl was isolated as an off white solid (69.5 g) that was assayed at 96 wt% (97.6 area % by HPLC), corresponding to an isolated yield of 80%. <sup>1</sup>H NMR (400 MHz, *d*<sub>6</sub>-dmsO)  $\delta$  9.95 (br s, 2H), 7.32 (t,  $J = 7.4\text{ Hz}$ , 1H), 7.25 (d,  $J = 7.4\text{ Hz}$ , 1H), 7.16 (d,  $J = 7.4\text{ Hz}$ , 1H), 5.96-5.84 (m, 1H), 5.10-5.04 (om, 2H), 4.48 (s, 2H), 4.45 (s, 2H), 3.37 (d,  $J = 6.5\text{ Hz}$ , 2H); <sup>13</sup>C NMR (100 MHz, *d*<sub>6</sub>-dmsO)  $\delta$  135.6, 135.1, 134.6, 133.8, 128.7, 128.3, 120.8, 116.4, 49.8, 48.7, 36.9; HRMS [M+H]<sup>+</sup> for C<sub>11</sub>H<sub>13</sub>N calc'd 160.1126, found 160.1128.

### Compound 3:

The identity of **3** was initially determined using LCMS. In an effort to independently verify the structure, an authentic sample was prepared from pure **1**.

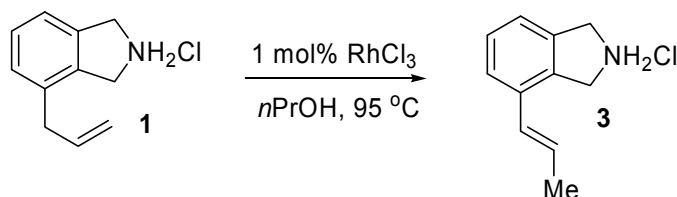

A flask was charged with **1**•HCl salt (0.5 g, 3.14 mmol) and  $\text{RhCl}_3$  hydrate (6 mg, 0.03 mmol), then  $n\text{PrOH}$  (15 mL). The flask was sealed under an  $\text{N}_2$  atmosphere and heated to  $T_i = 95\text{ }^\circ\text{C}$  for 10 h. The solution was gradually cooled to ambient temperature, whereupon a slurry formed. The product was filtered, and the cake was washed with  $n\text{PrOH}$ . Drying afforded 300 mg of **3**•HCl.  $^1\text{H}$  NMR (400 MHz,  $d_6$ -dmso)  $\delta$  9.56 (br s, 2H), 7.45 (d,  $J = 7.7$  Hz, 1H), 7.32 (t,  $J = 7.7$  Hz, 1H), 7.24 (d,  $J = 7.7$  Hz, 1H), 6.44 (dd,  $J = 15.8, 1.5$  Hz, 1H), 6.29 (dq,  $J = 15.8, 6.6$  Hz, 1H), 4.53 (s, 2H), 4.47 (s, 2H), 1.89 (dd,  $J = 6.6, 1.5$  Hz, 3H);  $^{13}\text{C}$  NMR (125 MHz,  $d_6$ -dmso)  $\delta$  135.5, 132.6, 131.8, 128.8, 128.6, 127.6, 124.6, 121.1, 49.8, 49.3, 18.5; HRMS  $[\text{M}+\text{H}]^+$  for  $\text{C}_{11}\text{H}_{13}\text{N}$  calc'd 160.1126, found 160.1130.

isolated 4-allylisoindoline HCl salt (d6-dmsO)

Current Data Parameters  
NAME 308822-032  
EXPNO 1  
PROCNO 1

F2 - Acquisition Parameters  
Date\_ 20101005  
Time\_ 11.13  
INSTRUM spect  
PROBHD 5 mm QNP 1H/1  
PULPROG zg30  
TD 32768  
SOLVENT CDCl3  
NS 32  
DS 2  
SWH 6561.680 Hz  
FIDRES 0.200247 Hz  
AQ 2.4970479 sec  
RG 406.4  
DW 76.200 usec  
DE 7.00 usec  
TE 300.2 K  
D1 0.10000000 sec  
TD0 1

===== CHANNEL f1 =====  
NUC1 1H  
P1 9.40 usec  
PL1 -5.00 dB  
SFO1 400.1324710 MHz

F2 - Processing parameters  
SI 16384  
SF 400.1300022 MHz  
WDW EM  
SSB 0  
LB 0.30 Hz  
GB 0  
PC 1.00

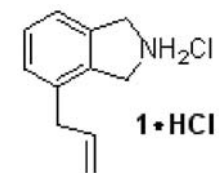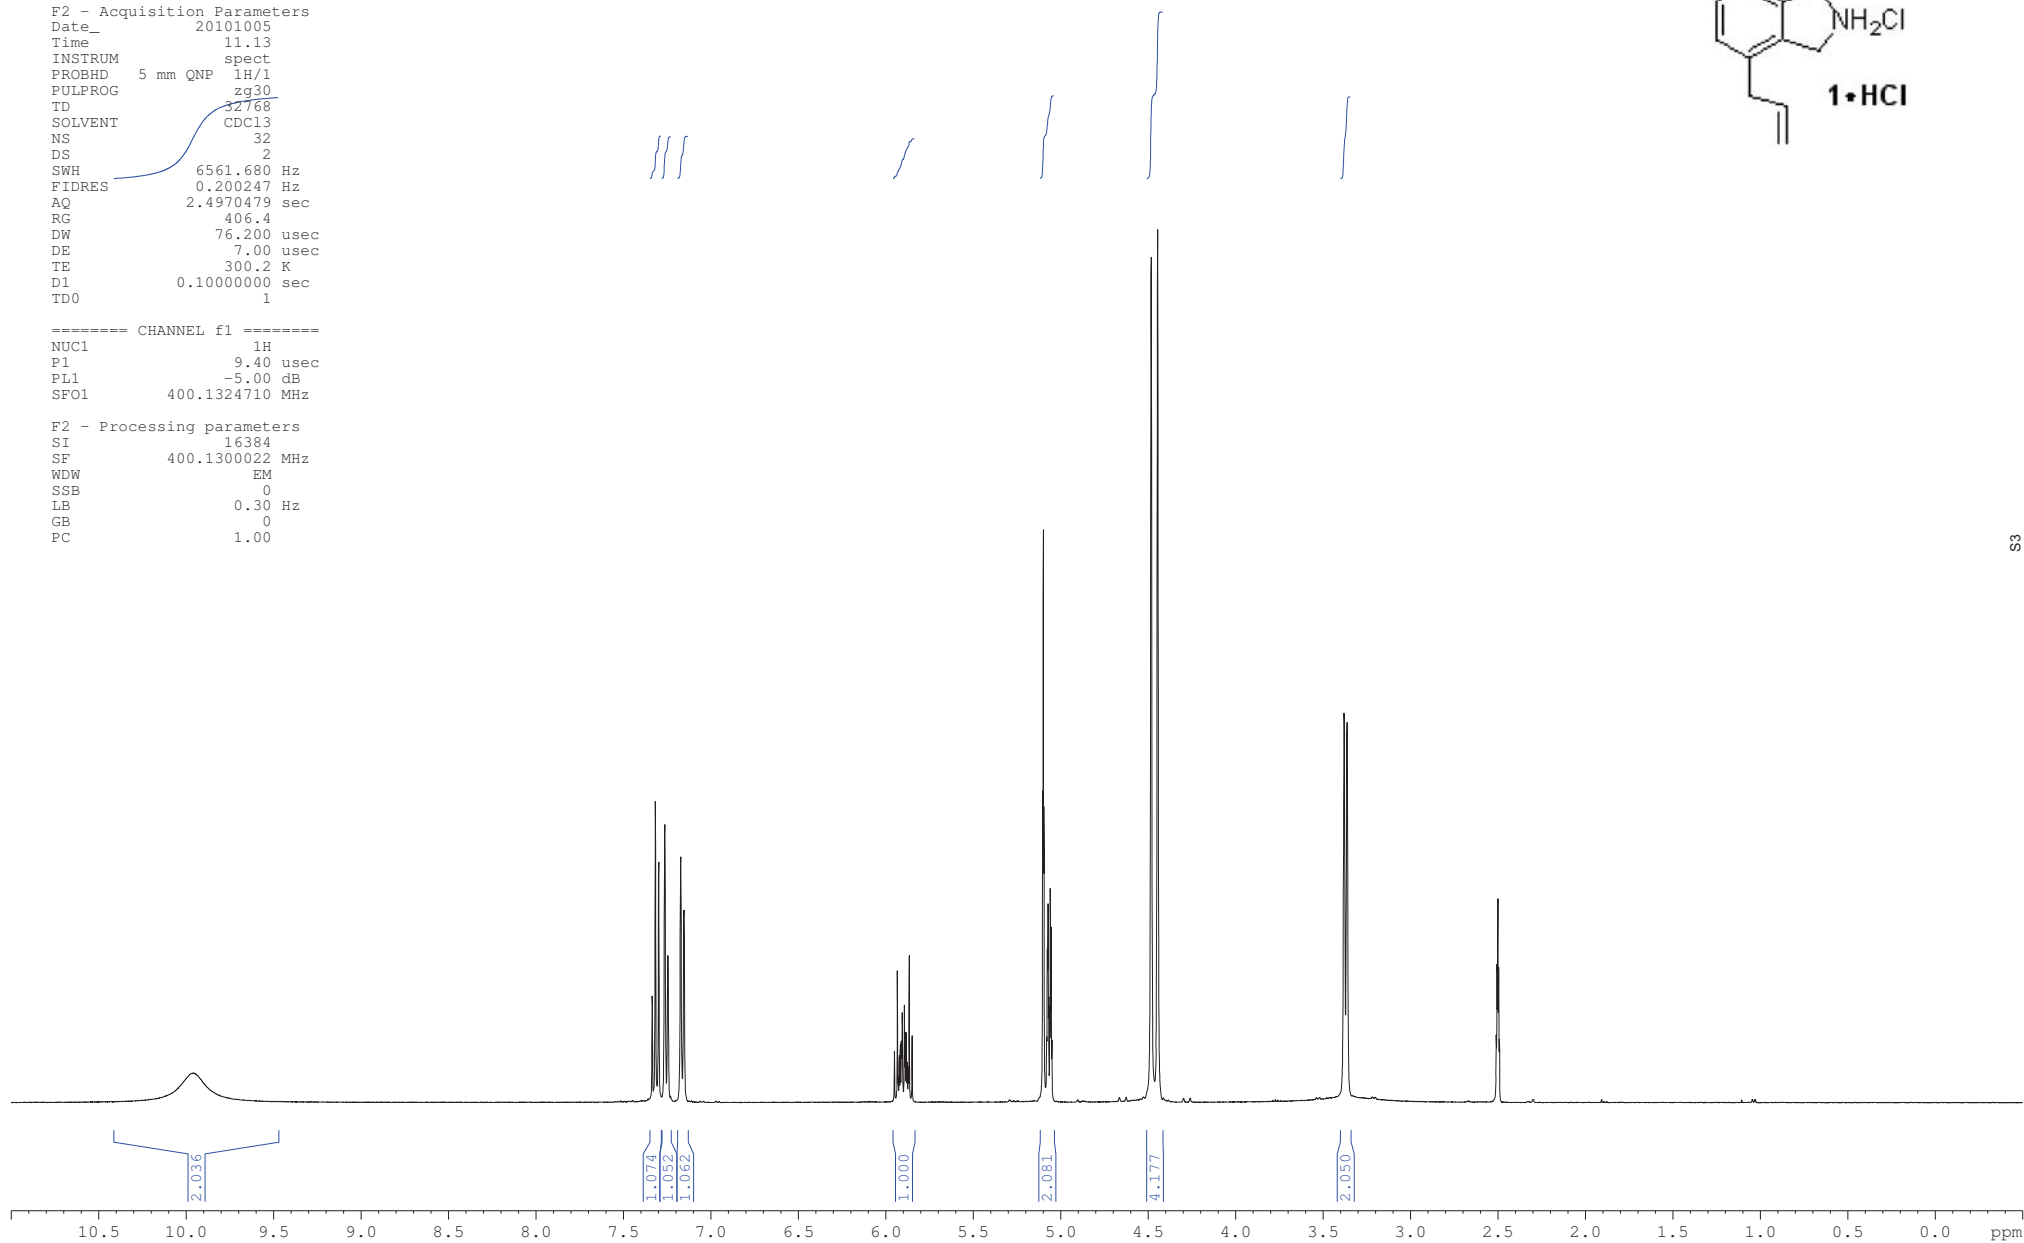

Current Data Parameters  
NAME 308822-021  
EXPNO 1  
PROCNO 1

F2 - Acquisition Parameters  
Date\_ 20100614  
Time 10.30  
INSTRUM spect  
PROBHD 5 mm QNP 1H/1  
PULPROG zgdc  
TD 65536  
SOLVENT CDC13  
NS 204  
DS 4  
SWH 26315.789 Hz  
FIDRES 0.401547 Hz  
AQ 1.2452340 sec  
RG 8192  
DW 19.000 usec  
DE 7.00 usec  
TE 300.0 K  
D1 0.50000000 sec  
d11 0.03000000 sec  
TD0 40

===== CHANNEL f1 =====  
NUC1 <sup>13</sup>C  
P1 4.00 usec  
PL1 0.00 dB  
SFO1 100.5584512 MHz

===== CHANNEL f2 =====  
CPDPRG2 waltz16  
NUC2 <sup>1</sup>H  
PCPD2 100.00 usec  
PL2 120.00 dB  
PL12 24.50 dB  
SFO2 399.8719994 MHz

F2 - Processing parameters  
SI 32768  
SF 100.5474454 MHz  
WDW EM  
SSB 0  
LB 1.00 Hz  
GB 0  
PC 1.40

135.61  
135.12  
134.62  
133.80  
128.67  
128.25  
120.76  
116.44

49.84  
48.65  
36.94

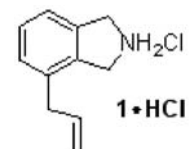

Current Data Parameters  
NAME 308822-030  
EXPNO 1  
PROCNO 1

F2 - Acquisition Parameters  
Date\_ 20100709  
Time 16.46  
INSTRUM spect  
PROBHD 5 mm QNP 1H/1  
PULPROG zg30  
TD 32768  
SOLVENT CDCl3  
NS 32  
DS 2  
SWH 6561.680 Hz  
FIDRES 0.200247 Hz  
AQ 2.4969716 sec  
RG 912.3  
DW 76.200 usec  
DE 7.00 usec  
TE 300.2 K  
D1 0.10000000 sec  
TD0 1

===== CHANNEL f1 =====  
NUC1 1H  
P1 9.40 usec  
PL1 -5.00 dB  
SFO1 400.1324710 MHz

F2 - Processing parameters  
SI 16384  
SF 400.1300024 MHz  
WDW no  
SSB 0  
LB 0.00 Hz  
GB 0  
PC 1.00

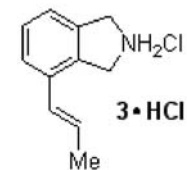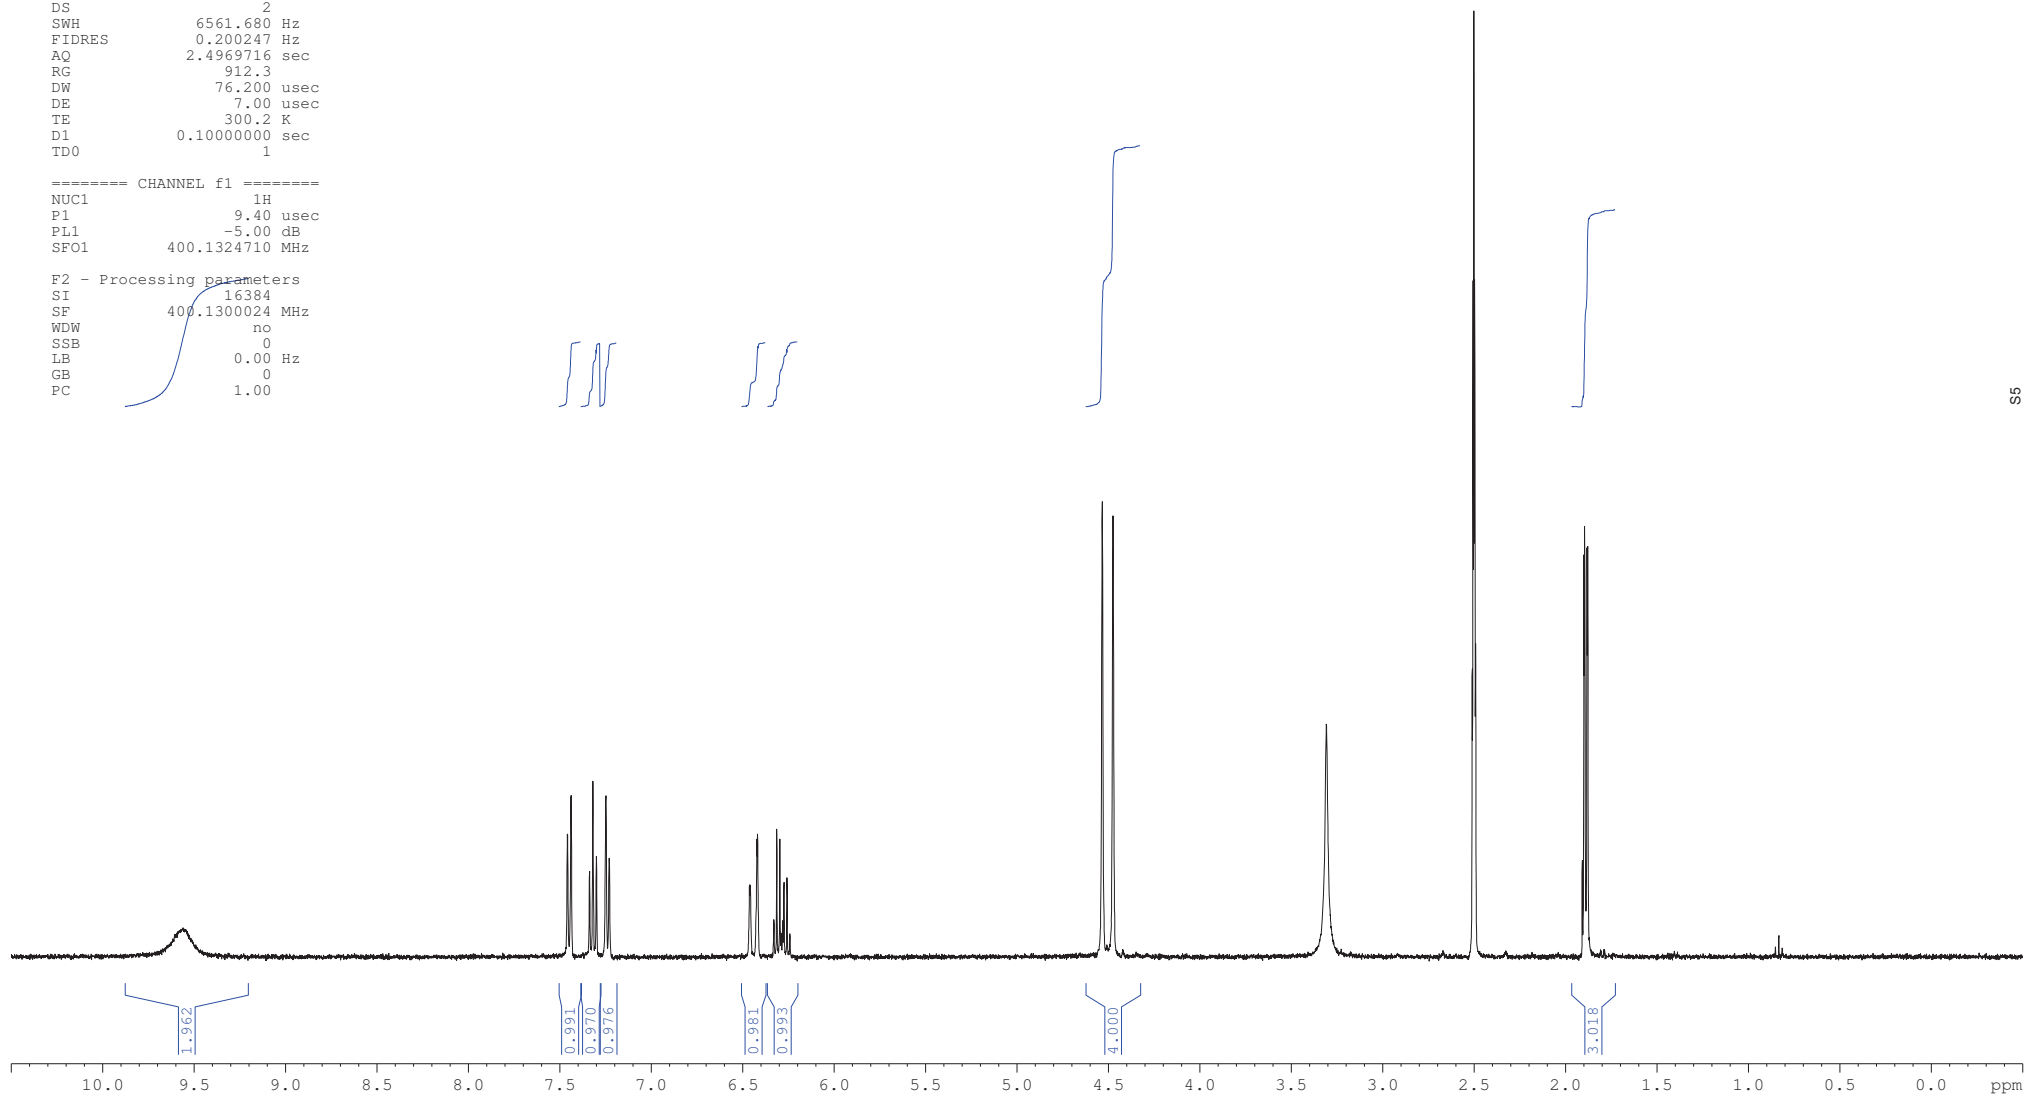

Current Data Parameters  
NAME 308822-030b  
EXPNO 1  
PROCNO 1

F2 - Acquisition Parameters  
Date\_ 20101020  
Time 14.13  
INSTRUM spect  
PROBHD 5 mm QNP 1H/13  
PULPROG zgdc  
TD 131072  
SOLVENT DMSO  
NS 325  
DS 4  
SWH 40322.582 Hz  
FIDRES 0.307637 Hz  
AQ 1.6253552 sec  
RG 2896.3  
DW 12.400 usec  
DE 6.50 usec  
TE 300.1 K  
D1 0.10000000 sec  
d11 0.03000000 sec  
TD0 40

===== CHANNEL f1 =====  
NUC1 13C  
P1 2.50 usec  
PL1 0.00 dB  
SFO1 125.7703648 MHz

===== CHANNEL f2 =====  
CPDPRG2 waltz16  
NUC2 1H  
PCPD2 80.00 usec  
PL12 11.50 dB  
PL2 120.00 dB  
SFO2 500.1325007 MHz

F2 - Processing parameters  
SI 65536  
SF 125.7578545 MHz  
WDW EM  
SSB 0  
LB 1.00 Hz  
GB 0  
PC 1.40

135.48  
132.62  
131.84  
128.82  
128.60  
127.57  
124.60  
121.05

49.75  
49.25  
40.00  
39.83  
39.66  
39.50  
39.33  
39.16  
39.00

18.54

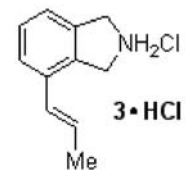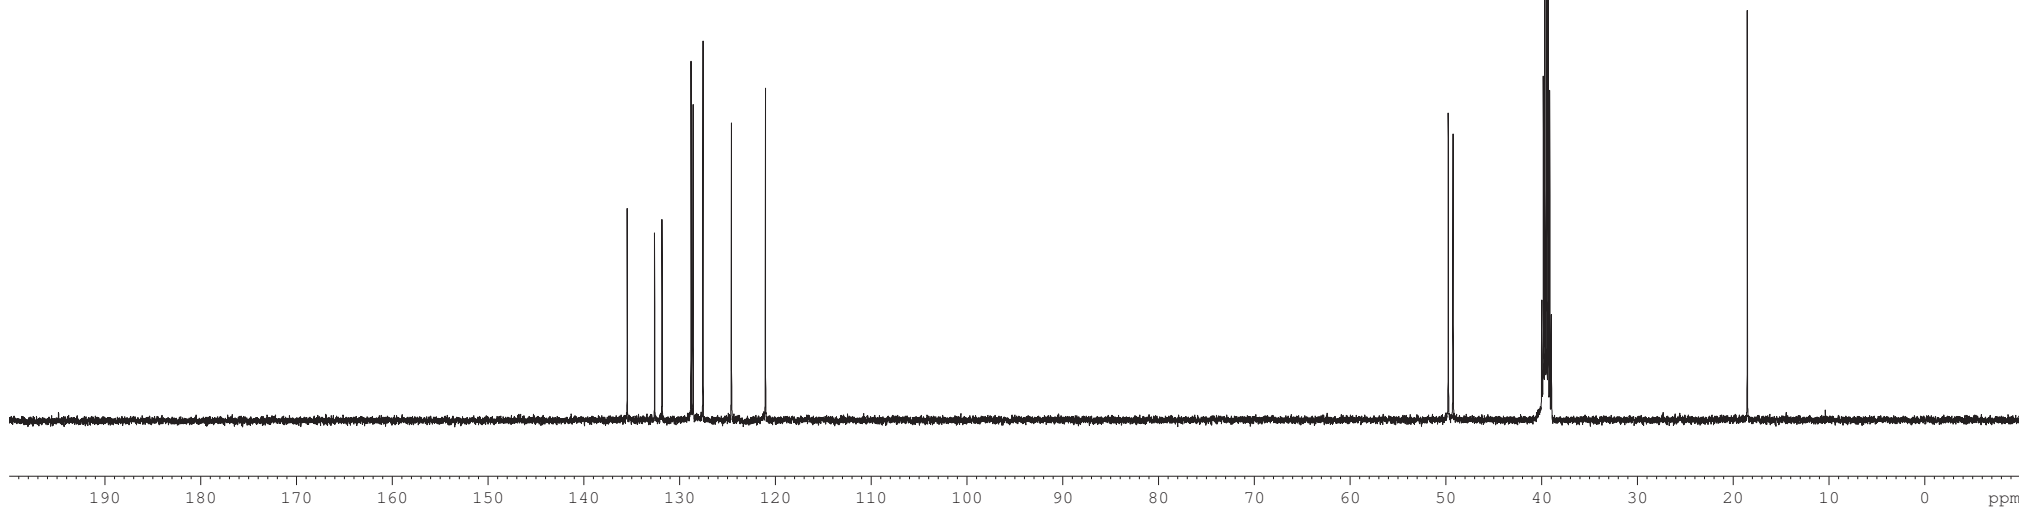

Supplement: Supplementary file 1 [file 4373536]
